# Supplementary material for: Methylation of softwood kraft lignin with dimethyl carbonate
Source: Royal Society of Chemistry journal article supplement (doi:10.1039/c4gc01759e), 2014-10-27
Supplement: c4gc01759e1.pdf [file c4gc01759e1.pdf]

## Supplementary Information For

### Methylation of Softwood Kraft Lignin with Dimethyl Carbonate

Sanghamitra Sen,<sup>a</sup> Shradha Patil<sup>a</sup> and Dimitris S. Argyropoulos<sup>a,b,\*</sup>

<sup>a</sup> Departments of Chemistry and Forest Biomaterials,  
North Carolina State University, Raleigh, North Carolina 27695-8005, United States

<sup>b</sup> Center of Excellence for Advanced Materials Research,  
King Abdulaziz University, Jeddah, Saudi Arabia

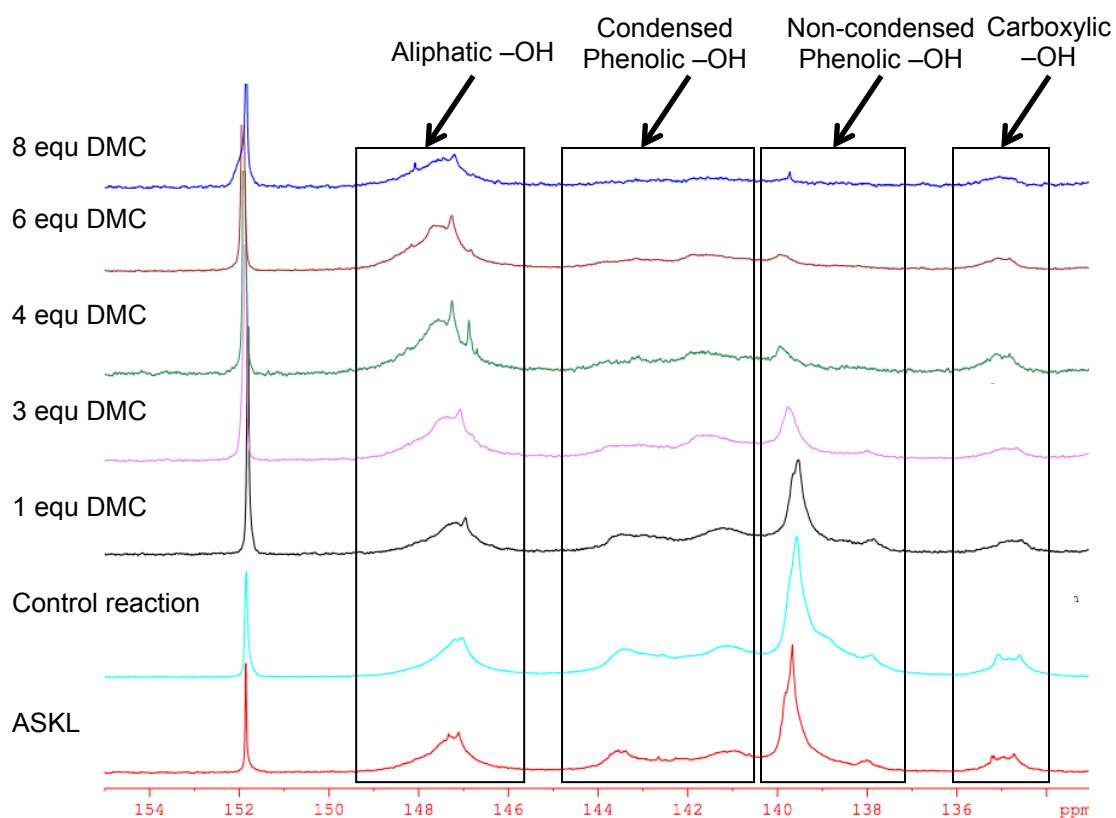

**S1.** Quantitative <sup>13</sup>P NMR spectra data of ASKL, control reaction and methylated samples synthesized using different equivalents of DMC.

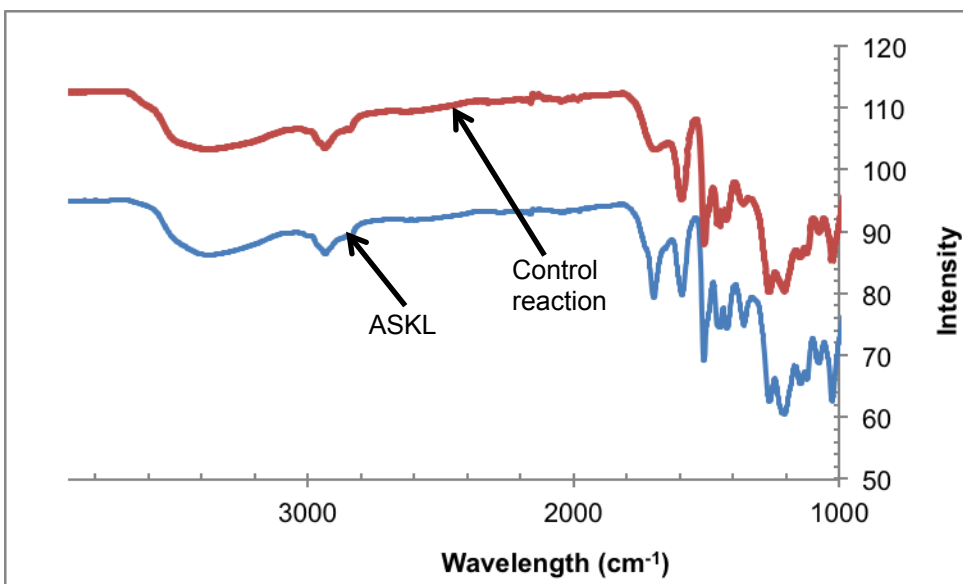

**S2:** FT-IR spectra of ASKL and control reaction (Base: NaOH).

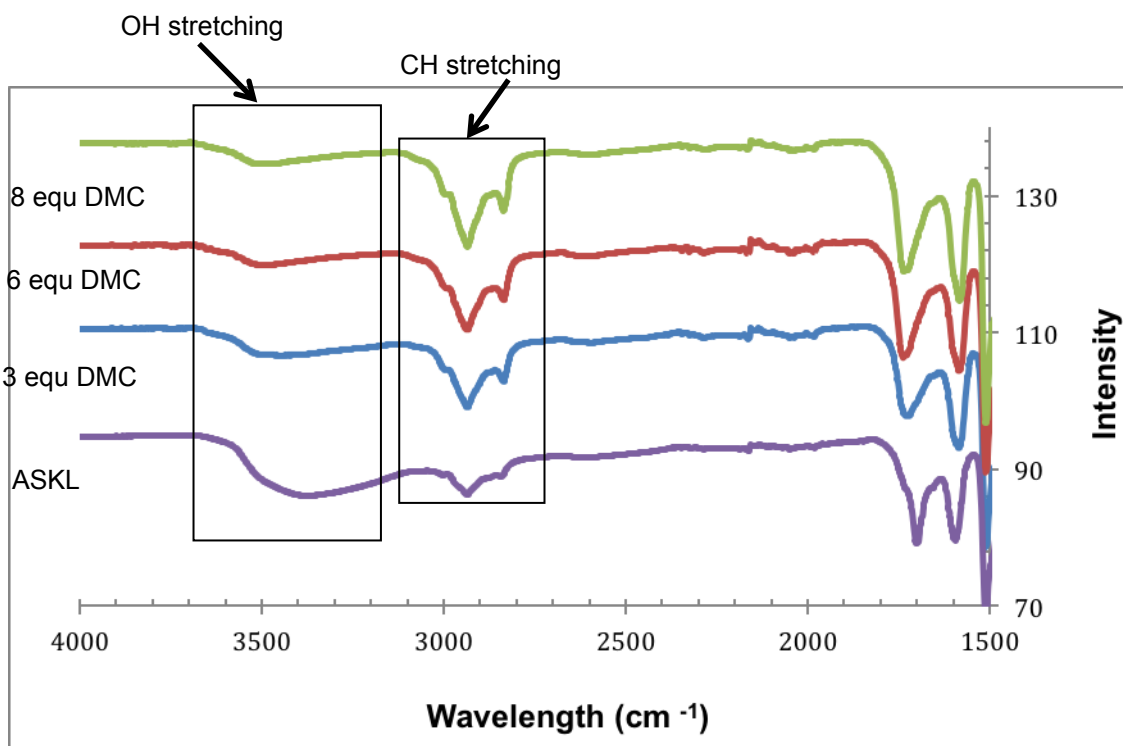

**S3.** Overlay of FT-IR spectra of ASKL and methylated samples using  $\text{Cs}_2\text{CO}_3$  base. Increasing DMC concentration reduces the broad  $-\text{OH}$  stretch ( $3200$  to  $3600$   $\text{cm}^{-1}$ ) and increases the  $\text{C-H}$  stretch ( $2900$  to  $3100$ )  $\text{cm}^{-1}$  as a result of methylation of hydroxyl groups in ASKL.

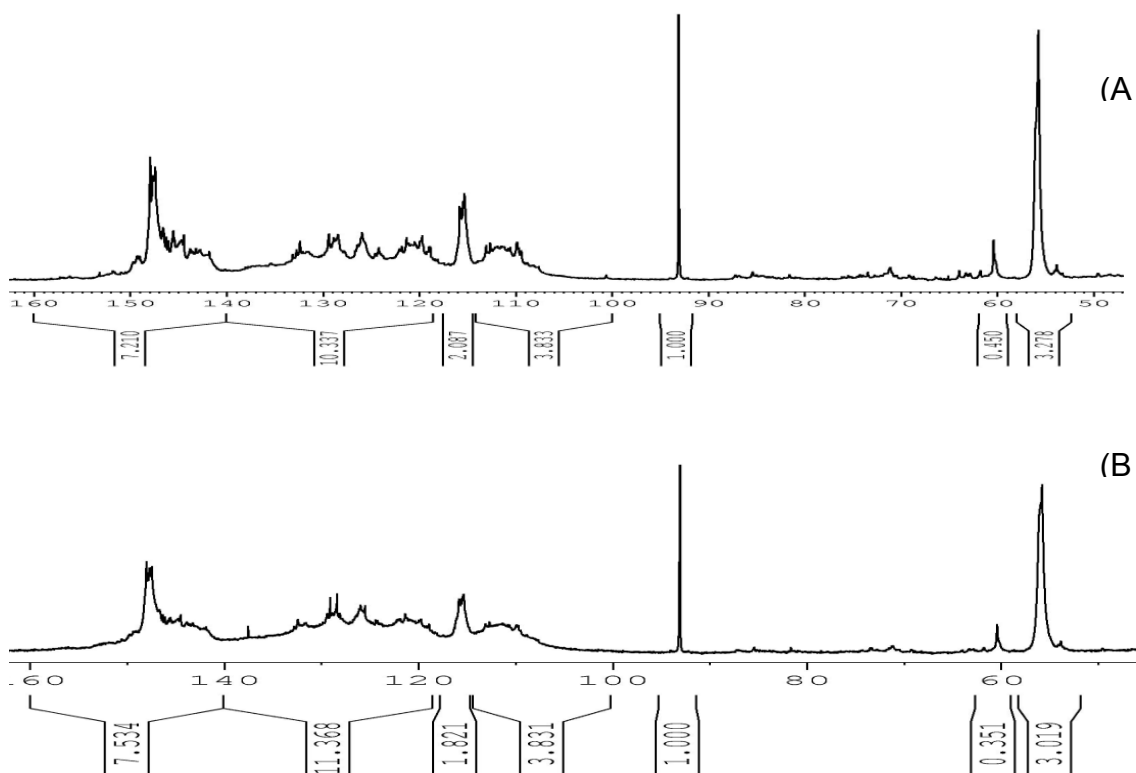

**S4.** Quantitative  $^{13}\text{C}$  NMR analysis of (A) ASKL (A) and (B) control reaction.

**S5.** Molecular weight distributions and PDI of the methylated lignin samples using NaOH and  $\text{Cs}_2\text{CO}_3$

| Base for Methylation     | Sample           | Mn (g/mol) | Mw (g/mol) | PDI |
|--------------------------|------------------|------------|------------|-----|
| NaOH                     | ASKL             | 1000       | 3000       | 3.0 |
|                          | Control reaction | 1000       | 2800       | 2.8 |
|                          | 6 equ. DMC       | 1400       | 4900       | 3.5 |
|                          | 8 equ. DMC       | 1500       | 4800       | 3.2 |
| $\text{Cs}_2\text{CO}_3$ | ASKL             | 1000       | 3000       | 3.0 |
|                          | 4.5 equ. DMC     | 1400       | 4600       | 3.2 |
|                          | 6 equ. DMC       | 1400       | 4700       | 3.3 |

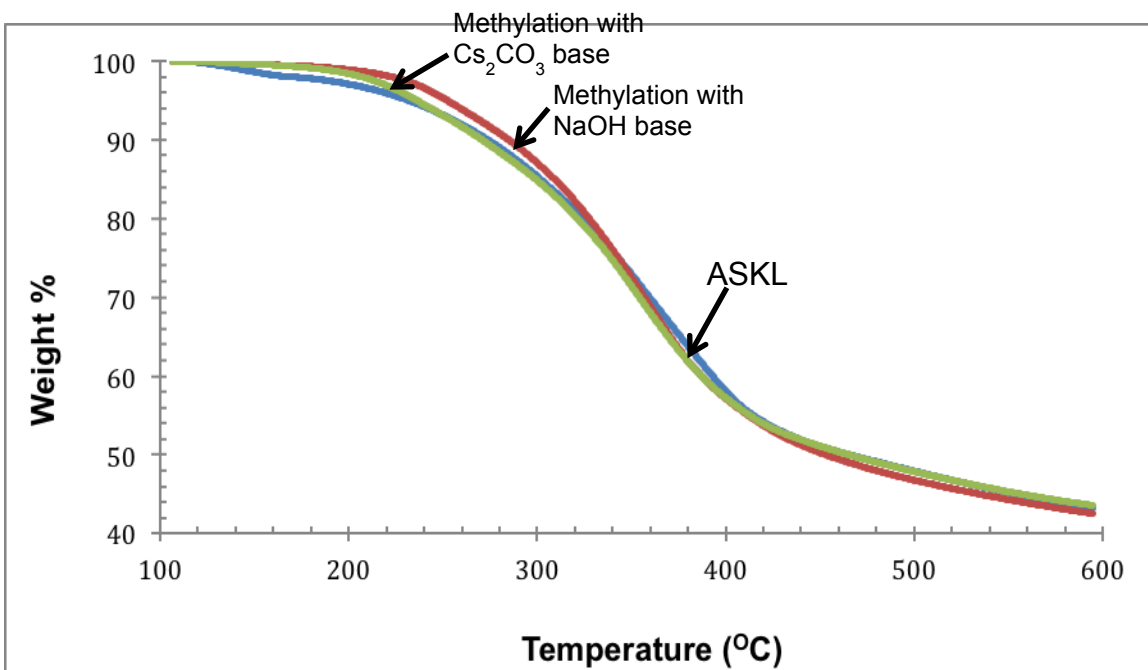

S6. TGA traces of ASKL, ASKL methylated in NaOH and ASKL methylated with Cs<sub>2</sub>CO<sub>3</sub>. No significant changes in the thermal stability is observed after methylation.

S7. Molecular weight distributions and PDI of unmethylated and methylated lignin before and after heating 20 °C above respective glass transition temperatures

| Sample          |                               | Mn<br>(g/mol) | Mw<br>(g/mol) | PDI |
|-----------------|-------------------------------|---------------|---------------|-----|
| ASKL            | ASKL                          | 1000          | 3000          | 3.0 |
|                 | 1 <sup>st</sup> heating cycle | 1400          | 4000          | 2.9 |
|                 | 2 <sup>nd</sup> heating cycle | 1100          | 4900          | 4.5 |
|                 | 3 <sup>rd</sup> heating cycle | 1400          | 5000          | 3.8 |
| Methylated ASKL | Methylated ASKL               | 1500          | 4800          | 3.2 |
|                 | 1 <sup>st</sup> heating cycle | 1300          | 4800          | 3.6 |
|                 | 2 <sup>nd</sup> heating cycle | 1350          | 4900          | 3.0 |
|                 | 3 <sup>rd</sup> heating cycle | 1300          | 4800          | 3.7 |
